# Supplementary material for: Generation of multi-valence CuxO by reduction with activated semi-coke and their collaboration in the selective reduction of NO with NH3
Source: Royal Society of Chemistry journal article supplement (doi:10.1039/d1ra07647g), 2022-01-01
Supplement: d1ra07647g1.pdf [file d1ra07647g1.pdf]

## *Supporting information*

### **Generation of multi-valence Cu<sub>x</sub>O by reduction with the activated semi-coke and their collaboration in the selective reduction of NO with NH<sub>3</sub>**

Bo Peng,<sup>a</sup> Shuoyang Liang,<sup>b</sup> Zheng Yan,<sup>c</sup> Hao Wang,<sup>a,d</sup> Zhao Meng<sup>d</sup> and Mei Zhang<sup>\*a</sup>

---

<sup>a.</sup> State Key Laboratory of Advanced Metallurgy, School of Metallurgical and Ecological Engineering, University of Science and Technology Beijing, Beijing 100083, PR China.

<sup>b.</sup> School of Environmental Science and Engineering, Southern University of Science and Technology, Shenzhen, 518055, PR China.

<sup>c.</sup> College of energy & environment, Shenyang Aerospace University, Shenyang, 110136, PR China.

<sup>d.</sup> School of Materials Science and Engineering, Peking University, Beijing 100871, PR China.

\* Corresponding author: **Mei Zhang**

zhangmei@ustb.edu.cn

## **N<sub>2</sub> selectivity.**

The N<sub>2</sub> selectivity of SCR process can be calculated according to the concentration of inlet and outlet gases stream, as follows:

$$N_2 \text{ selectivity (\%)} = \left( 1 - \frac{[NO]_{out}}{[NO]_{in} - [NO]_{out}} \right) \times 100\%$$

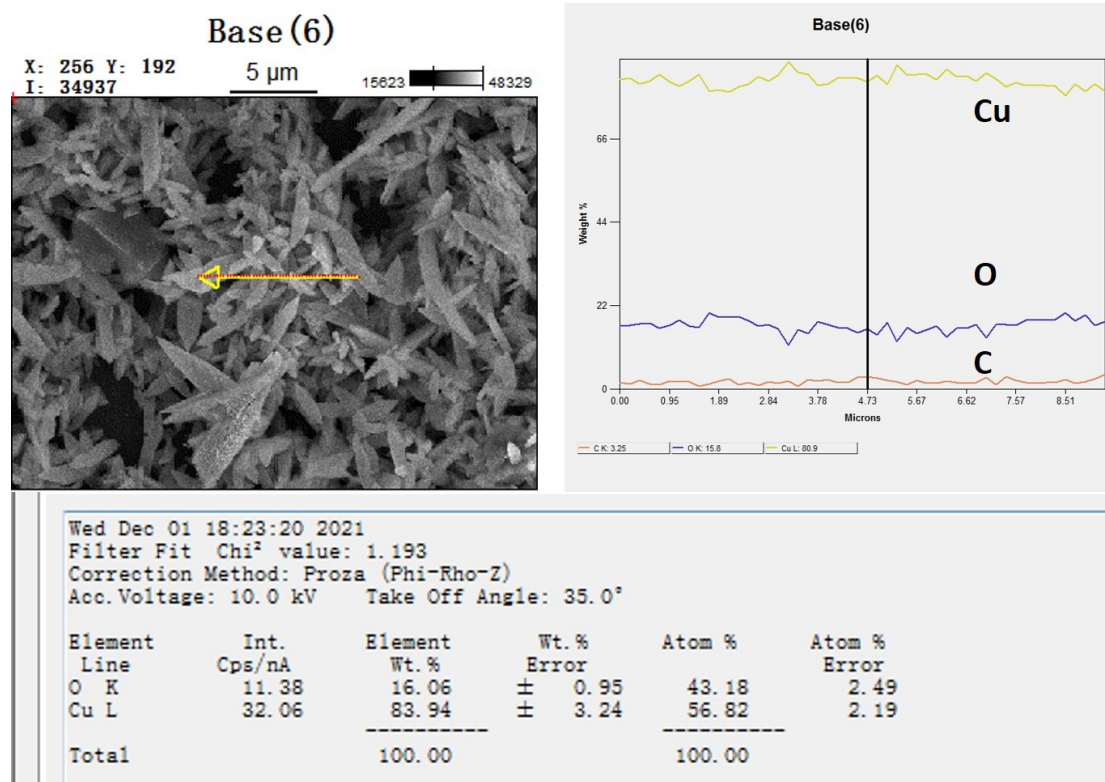

**Figure S1.** Elemental distribution of the best-performant catalyst (Cu1.0-350).

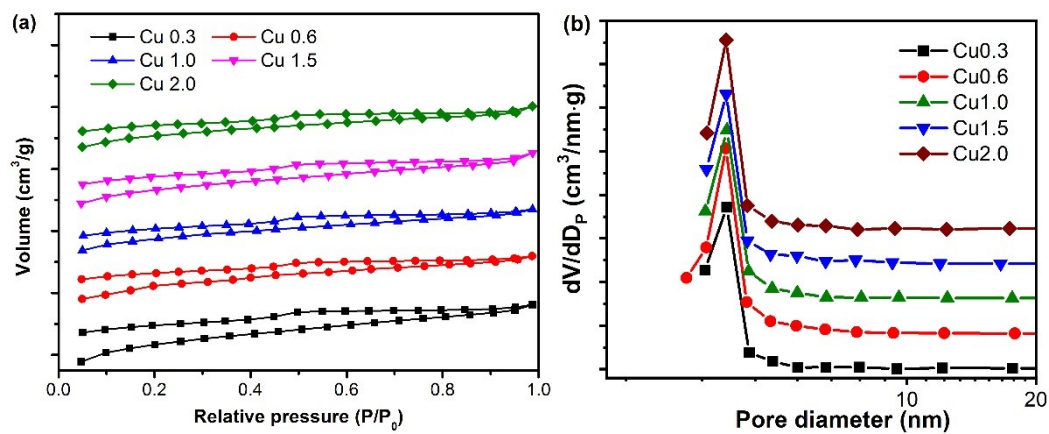

**Figure S2.** (a)  $N_2$  adsorption isotherms and (b) BJH pore size distributions of these catalysts with different Cu loading.

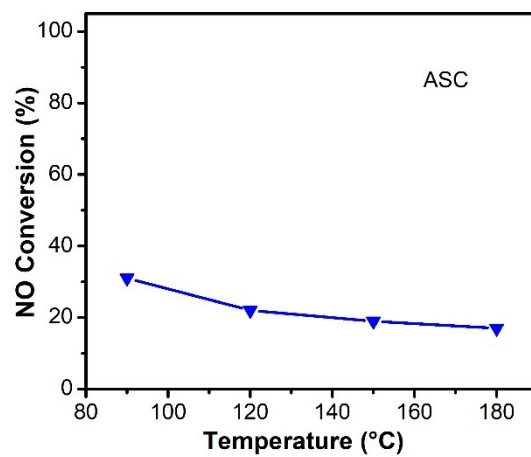

**Figure S3.** Reaction activity of the ASC.

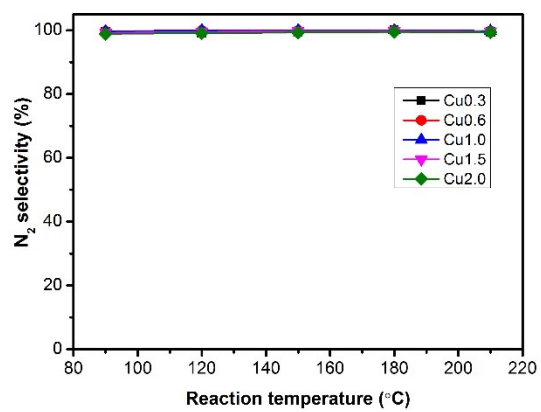

**Figure S4.** N<sub>2</sub> selectivity of these catalysts with different Cu loading.

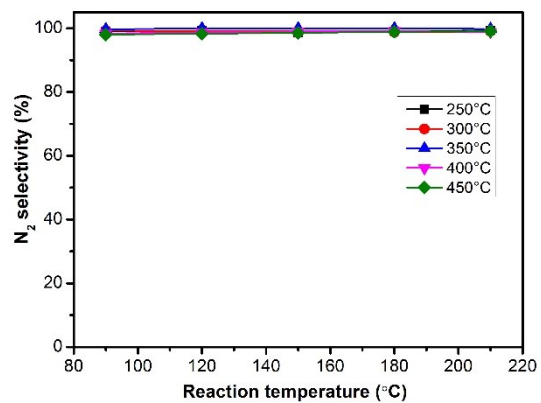

**Figure S5.** N<sub>2</sub> selectivity of these catalysts under different calcination temperature.
